# Supplementary material for: Synthesis of symmetrical and unsymmetrical bis(pyrrolo[2,3-d]pyrimidinyl)methanes
Source: Royal Society of Chemistry journal article supplement (doi:10.1039/c4ra09729g), 2014-11-03
Supplement: c4ra09729g2.pdf [file c4ra09729g2.pdf]

## Supporting Information

**Title:** Synthesis of symmetrical and unsymmetrical  
bis(pyrrolo[2,3-*d*]pyrimidinyl)methanes

**Author(s):** Meenakshi Sharma and Pulak J. Bhuyan\*

### General considerations:

Acetanilide is taken as standard for calibration of the instrument. Run 105, 117, 127, 145, 165 and 217 are of standard (ID STD)

### List of Contents

**ID No. of compounds 3a-p, 7a-e and 9a-q.....S2**

**CHN Analytical Report of compounds 3a-p, 7a-e and 9a-q.....S3-S11**

| <b>ID No.</b> | <b>Compound</b> | <b>ID No.</b> | <b>Compound</b> | <b>ID No.</b> | <b>Compound</b> |
|---------------|-----------------|---------------|-----------------|---------------|-----------------|
|               | <b>No.</b>      |               | <b>No.</b>      |               | <b>No.</b>      |
| MS 1          | <b>3a</b>       | MS 18         | <b>7b</b>       | MS 33         | <b>9j</b>       |
| MS 2          | <b>3b</b>       | MS 19         | <b>7c</b>       | MS 34         | <b>9k</b>       |
| MS 3          | <b>3c</b>       | MS 41         | <b>7d</b>       | MS 35         | <b>9l</b>       |
| MS 6          | <b>3f</b>       | MS 42         | <b>7e</b>       | MS 36         | <b>9m</b>       |
| MS 9          | <b>3i</b>       | MS 20         | <b>9a</b>       | MS 37         | <b>9n</b>       |
| MS 10         | <b>3j</b>       | MS 23         | <b>9b</b>       | MS 38         | <b>9o</b>       |
| MS 11         | <b>3k</b>       | MS 26         | <b>9c</b>       | MS 39         | <b>9p</b>       |
| MS 12         | <b>3l</b>       | MS 27         | <b>9d</b>       | MS 40         | <b>9q</b>       |
| MS 13         | <b>3m</b>       | MS 28         | <b>9e</b>       |               |                 |
| MS 14         | <b>3n</b>       | MS 29         | <b>9f</b>       |               |                 |
| MS 15         | <b>3o</b>       | MS 30         | <b>9g</b>       |               |                 |
| MS 16         | <b>3p</b>       | MS 31         | <b>9h</b>       |               |                 |
| MS 17         | <b>7a</b>       | MS 32         | <b>9i</b>       |               |                 |

DATE 08 04 14      TIME 13 23 46      OPERATOR ID ANC15 PPK  
RUN 105 ID STD                      WEIGHT 1.642

SIGNALS

|                 |          |
|-----------------|----------|
| CARBON 70.90%   | ZR 4068  |
| HYDROGEN 6.96%  | NR 4899  |
| NITROGEN 11.36% | CR 22569 |
|                 | HR 27705 |

FILL TIME 39 SECONDS

DATE 08 04 14      TIME 13 29 47      OPERATOR ID ANC15 PPK  
RUN 106 ID MS 1                      WEIGHT 1.876

SIGNALS

|                 |          |
|-----------------|----------|
| CARBON 60.80%   | ZR 4081  |
| HYDROGEN 4.71%  | NR 5735  |
| NITROGEN 17.75% | CR 21599 |
|                 | HR 26126 |

FILL TIME 39 SECONDS

DATE 08 04 14      TIME 13 35 29      OPERATOR ID ANC15 PPK  
RUN 107 ID MS 2                      WEIGHT 1.962

SIGNALS

|                 |          |
|-----------------|----------|
| CARBON 61.49%   | ZR 4080  |
| HYDROGEN 4.97%  | NR 5900  |
| NITROGEN 17.26% | CR 22866 |
|                 | HR 27069 |

FILL TIME 39 SECONDS

DATE 08 04 14      TIME 13 41 10      OPERATOR ID ANC15 PPK  
RUN 108 ID MS 3                      WEIGHT 1.804

SIGNALS

|                 |          |
|-----------------|----------|
| CARBON 59.57%   | ZR 4067  |
| HYDROGEN 4.87%  | NR 6137  |
| NITROGEN 16.69% | CR 20001 |
|                 | HR 24047 |

FILL TIME 39 SECONDS

DATE 08 04 14      TIME 13 47 06      OPERATOR ID ANC15 PPK  
RUN 109 ID MS 4                      WEIGHT 1.920

SIGNALS

|                 |          |
|-----------------|----------|
| CARBON 56.70%   | ZR 4060  |
| HYDROGEN 4.19%  | NR 8864  |
| NITROGEN 16.55% | CR 21917 |
|                 | HR 26541 |

FILL TIME 39 SECONDS

DATE 09 04 14      TIME 13 26 46      OPERATOR ID ANC15 PPK

RUN 117 ID STD      WEIGHT 1.642

SIGNALS

|                 |          |
|-----------------|----------|
| CARBON 70.91%   | ZR 4067  |
| HYDROGEN 6.95%  | NR 4897  |
| NITROGEN 11.35% | CR 22579 |
|                 | HR 27785 |

FILL TIME 39 SECONDS

DATE 09 04 14      TIME 13 29 45      OPERATOR ID ANC15 PPK

RUN 118 ID MS 5      WEIGHT 1.896

SIGNALS

|                 |          |
|-----------------|----------|
| CARBON 52.16%   | ZR 4089  |
| HYDROGEN 3.89%  | NR 5726  |
| NITROGEN 15.25% | CR 21299 |
|                 | HR 27126 |

FILL TIME 39 SECONDS

DATE 09 04 14      TIME 13 35 29      OPERATOR ID ANC15 PPK

RUN 119 ID MS 6      WEIGHT 1.862

SIGNALS

|                 |          |
|-----------------|----------|
| CARBON 55.56%   | ZR 4088  |
| HYDROGEN 4.19%  | NR 5908  |
| NITROGEN 18.95% | CR 22886 |
|                 | HR 28069 |

FILL TIME 39 SECONDS

DATE 09 04 14      TIME 13 41 19      OPERATOR ID ANC15 PPK

RUN 120 ID MS 7      WEIGHT 1.897

SIGNALS

|                 |          |
|-----------------|----------|
| CARBON 55.06%   | ZR 4057  |
| HYDROGEN 4.25%  | NR 6138  |
| NITROGEN 17.58% | CR 20081 |
|                 | HR 24087 |

FILL TIME 39 SECONDS

DATE 09 04 14      TIME 13 47 46      OPERATOR ID ANC15 PPK

RUN 121 ID MS 8      WEIGHT 1.980

SIGNALS

|                 |          |
|-----------------|----------|
| CARBON 64.21%   | ZR 4050  |
| HYDROGEN 4.69%  | NR 8860  |
| NITROGEN 16.15% | CR 20617 |
|                 | HR 28641 |

FILL TIME 39 SECONDS

DATE 10 04 14      TIME 13 36 40      OPERATOR ID ANC15 PPK

RUN 127 ID STD      WEIGHT 1.671

SIGNALS

|                 |          |
|-----------------|----------|
| CARBON 70.92%   | ZR 4088  |
| HYDROGEN 6.98%  | NR 4767  |
| NITROGEN 11.37% | CR 22679 |
|                 | HR 26785 |

FILL TIME 39 SECONDS

DATE 10 04 14      TIME 13 39 40      OPERATOR ID ANC15 PPK

RUN 128 ID MS 9      WEIGHT 1.996

SIGNALS

|                 |          |
|-----------------|----------|
| CARBON 59.26%   | ZR 4079  |
| HYDROGEN 4.14%  | NR 5826  |
| NITROGEN 18.89% | CR 20289 |
|                 | HR 28136 |

FILL TIME 39 SECONDS

DATE 10 04 14      TIME 13 42 22      OPERATOR ID ANC15 PPK

RUN 129 ID MS 10      WEIGHT 1.892

SIGNALS

|                 |          |
|-----------------|----------|
| CARBON 60.09%   | ZR 4068  |
| HYDROGEN 4.47%  | NR 5906  |
| NITROGEN 18.34% | CR 23896 |
|                 | HR 28069 |

FILL TIME 39 SECONDS

DATE 10 04 14      TIME 13 44 17      OPERATOR ID ANC15 PPK

RUN 130 ID MS 11      WEIGHT 1.997

SIGNALS

|                 |          |
|-----------------|----------|
| CARBON 58.02%   | ZR 4087  |
| HYDROGEN 4.31%  | NR 6148  |
| NITROGEN 17.70% | CR 20881 |
|                 | HR 25087 |

FILL TIME 39 SECONDS

DATE 10 04 14      TIME 13 47 46      OPERATOR ID ANC15 PPK

RUN 131 ID MS 12      WEIGHT 1.926

SIGNALS

|                 |          |
|-----------------|----------|
| CARBON 55.15%   | ZR 4078  |
| HYDROGEN 3.61%  | NR 8760  |
| NITROGEN 17.51% | CR 20611 |
|                 | HR 27641 |

FILL TIME 39 SECONDS

DATE 10 04 14      TIME 13 49 16      OPERATOR ID ANC15 PPK

RUN 132 ID MS 13      WEIGHT 1.936

SIGNALS

|                 |          |
|-----------------|----------|
| CARBON 50.42%   | ZR 4098  |
| HYDROGEN 3.32%  | NR 6057  |
| NITROGEN 15.29% | CR 20891 |
|                 | HR 26089 |

FILL TIME 39 SECONDS

DATE 10 04 14      TIME 13 51 16      OPERATOR ID ANC15 PPK

RUN 133 ID MS 14      WEIGHT 1.946

SIGNALS

|                 |          |
|-----------------|----------|
| CARBON 53.82%   | ZR 4066  |
| HYDROGEN 3.57%  | NR 8769  |
| NITROGEN 20.06% | CR 20714 |
|                 | HR 27741 |

FILL TIME 39 SECONDS

DATE 10 04 14      TIME 13 52 36      OPERATOR ID ANC15 PPK

RUN 134 ID MS 15      WEIGHT 1.876

SIGNALS

|                 |          |
|-----------------|----------|
| CARBON 53.15%   | ZR 4049  |
| HYDROGEN 3.61%  | NR 6053  |
| NITROGEN 18.64% | CR 20793 |
|                 | HR 25079 |

FILL TIME 39 SECONDS

DATE 10 04 14      TIME 13 54 20      OPERATOR ID ANC15 PPK

RUN 135 ID MS 16      WEIGHT 1.895

SIGNALS

|                 |          |
|-----------------|----------|
| CARBON 63.11%   | ZR 4069  |
| HYDROGEN 4.09%  | NR 8799  |
| NITROGEN 17.15% | CR 20615 |
|                 | HR 28791 |

FILL TIME 39 SECONDS

DATE 11 04 14      TIME 13 20 49      OPERATOR ID ANC15 PPK

RUN 145 ID STD      WEIGHT 1.692

SIGNALS

|                 |          |
|-----------------|----------|
| CARBON 70.99%   | ZR 4057  |
| HYDROGEN 6.85%  | NR 4895  |
| NITROGEN 11.75% | CR 25179 |
|                 | HR 27679 |

FILL TIME 39 SECONDS

DATE 11 04 14      TIME 13 29 45      OPERATOR ID ANC15 PPK

RUN 146 ID MS 17      WEIGHT 1.875

SIGNALS

|                 |          |
|-----------------|----------|
| CARBON 59.71%   | ZR 4091  |
| HYDROGEN 5.19%  | NR 5746  |
| NITROGEN 16.65% | CR 21264 |
|                 | HR 26129 |

FILL TIME 39 SECONDS

DATE 11 04 14      TIME 13 33 24      OPERATOR ID ANC15 PPK

RUN 147 ID MS 18      WEIGHT 1.868

SIGNALS

|                 |          |
|-----------------|----------|
| CARBON 58.39%   | ZR 4087  |
| HYDROGEN 5.29%  | NR 5708  |
| NITROGEN 15.55% | CR 22847 |
|                 | HR 29039 |

FILL TIME 39 SECONDS

DATE 11 04 14      TIME 13 35 33      OPERATOR ID ANC15 PPK

RUN 148 ID MS 19      WEIGHT 1.945

SIGNALS

|                 |          |
|-----------------|----------|
| CARBON 53.99%   | ZR 4038  |
| HYDROGEN 4.49%  | NR 6083  |
| NITROGEN 18.15% | CR 20895 |
|                 | HR 26878 |

FILL TIME 39 SECONDS

DATE 11 04 14      TIME 13 39 43      OPERATOR ID ANC15 PPK

RUN 149 ID MS 20      WEIGHT 1.989

SIGNALS

|                 |          |
|-----------------|----------|
| CARBON 61.88%   | ZR 4049  |
| HYDROGEN 4.93%  | NR 5783  |
| NITROGEN 18.83% | CR 20589 |
|                 | HR 26820 |

FILL TIME 39 SECONDS

DATE 11 04 14      TIME 13 43 21      OPERATOR ID ANC15 PPK

RUN 152 ID MS 23      WEIGHT 1.793

SIGNALS

|                 |          |
|-----------------|----------|
| CARBON 60.28%   | ZR 4085  |
| HYDROGEN 4.34%  | NR 8192  |
| NITROGEN 20.09% | CR 20619 |
|                 | HR 29398 |

FILL TIME 39 SECONDS

DATE 11 04 14      TIME 13 46 01      OPERATOR ID ANC15 PPK  
RUN 155 ID MS 26      WEIGHT 1.708

SIGNALS

|                 |          |
|-----------------|----------|
| CARBON 61.22%   | ZR 4008  |
| HYDROGEN 4.67%  | NR 8092  |
| NITROGEN 19.56% | CR 20580 |
|                 | HR 28507 |

FILL TIME 39 SECONDS

DATE 17 04 14      TIME 13 20 47      OPERATOR ID ANC15 PPK  
RUN 165 ID STD      WEIGHT 1.662

SIGNALS

|                 |          |
|-----------------|----------|
| CARBON 70.09%   | ZR 4066  |
| HYDROGEN 6.35%  | NR 4099  |
| NITROGEN 11.79% | CR 25139 |
|                 | HR 27949 |

FILL TIME 39 SECONDS

DATE 17 04 14      TIME 13 23 15      OPERATOR ID ANC15 PPK  
RUN 166 ID MS 27      WEIGHT 1.824

SIGNALS

|                 |          |
|-----------------|----------|
| CARBON 59.82%   | ZR 4094  |
| HYDROGEN 4.87%  | NR 5906  |
| NITROGEN 18.26% | CR 21065 |
|                 | HR 26339 |

FILL TIME 39 SECONDS

DATE 17 04 14      TIME 13 25 24      OPERATOR ID ANC15 PPK  
RUN 167 ID MS 28      WEIGHT 1.850

SIGNALS

|                 |          |
|-----------------|----------|
| CARBON 55.42%   | ZR 4090  |
| HYDROGEN 4.17%  | NR 5908  |
| NITROGEN 20.62% | CR 22940 |
|                 | HR 29059 |

FILL TIME 39 SECONDS

DATE 17 04 14      TIME 13 26 05      OPERATOR ID ANC15 PPK  
RUN 168 ID MS 29      WEIGHT 1.900

SIGNALS

|                 |          |
|-----------------|----------|
| CARBON 62.72%   | ZR 4094  |
| HYDROGEN 5.27%  | NR 5009  |
| NITROGEN 18.32% | CR 21809 |
|                 | HR 26209 |

FILL TIME 39 SECONDS

DATE 17 04 14      TIME 13 27 44      OPERATOR ID ANC15 PPK  
RUN 169 ID MS 30      WEIGHT 1.832

SIGNALS

|                 |          |
|-----------------|----------|
| CARBON 61.32%   | ZR 4078  |
| HYDROGEN 5.37%  | NR 5984  |
| NITROGEN 17.22% | CR 22670 |
|                 | HR 27069 |

FILL TIME 39 SECONDS



DATE 17 04 14      TIME 13 29 13      OPERATOR ID ANC15 PPK  
RUN 170 ID MS 31      WEIGHT 1.932

SIGNALS

|                 |          |
|-----------------|----------|
| CARBON 57.12%   | ZR 4604  |
| HYDROGEN 4.67%  | NR 5079  |
| NITROGEN 19.50% | CR 21729 |
|                 | HR 26439 |

FILL TIME 39 SECONDS

DATE 17 04 14      TIME 13 30 32      OPERATOR ID ANC15 PPK  
RUN 171 ID MS 32      WEIGHT 1.880

SIGNALS

|                 |          |
|-----------------|----------|
| CARBON 61.92%   | ZR 4036  |
| HYDROGEN 5.07%  | NR 5962  |
| NITROGEN 18.94% | CR 22852 |
|                 | HR 27329 |

FILL TIME 39 SECONDS

DATE 17 04 14      TIME 13 31 11      OPERATOR ID ANC15 PPK  
RUN 172 ID MS 33      WEIGHT 1.940

SIGNALS

|                 |          |
|-----------------|----------|
| CARBON 60.62%   | ZR 4683  |
| HYDROGEN 5.17%  | NR 5038  |
| NITROGEN 17.74% | CR 24708 |
|                 | HR 26483 |

FILL TIME 39 SECONDS

DATE 17 04 14      TIME 13 32 22      OPERATOR ID ANC15 PPK  
RUN 173 ID MS 34      WEIGHT 1.836

SIGNALS

|                 |          |
|-----------------|----------|
| CARBON 56.32%   | ZR 4025  |
| HYDROGEN 4.37%  | NR 5670  |
| NITROGEN 20.08% | CR 23880 |
|                 | HR 27334 |

FILL TIME 39 SECONDS

DATE 17 10 14      TIME 13 24 06      OPERATOR ID ANC15 PPK  
RUN 217 ID STD      WEIGHT 1.602

SIGNALS

|                 |          |
|-----------------|----------|
| CARBON 70.91%   | ZR 4069  |
| HYDROGEN 6.96%  | NR 4867  |
| NITROGEN 11.36% | CR 22959 |
|                 | HR 27785 |

FILL TIME 39 SECONDS

DATE 17 10 14      TIME 13 26 10      OPERATOR ID ANC15 PPK  
RUN 218 ID MS 35      WEIGHT 1.832

SIGNALS

|                 |          |
|-----------------|----------|
| CARBON 54.80%   | ZR 4032  |
| HYDROGEN 4.16%  | NR 5829  |
| NITROGEN 19.18% | CR 21209 |
|                 | HR 27110 |

FILL TIME 39 SECONDS

DATE 17 10 14      TIME 13 28 39      OPERATOR ID ANC15 PPK  
RUN 219 ID MS 36      WEIGHT 1.832

SIGNALS

|                 |          |
|-----------------|----------|
| CARBON 57.30%   | ZR 4839  |
| HYDROGEN 5.59%  | NR 5908  |
| NITROGEN 21.11% | CR 21906 |
|                 | HR 27060 |

FILL TIME 39 SECONDS

DATE 17 10 14      TIME 13 30 46      OPERATOR ID ANC15 PPK  
RUN 220 ID MS 37      WEIGHT 1.763

SIGNALS

|                 |          |
|-----------------|----------|
| CARBON 56.66%   | ZR 5007  |
| HYDROGEN 4.76%  | NR 4809  |
| NITROGEN 18.03% | CR 26509 |
|                 | HR 20565 |

FILL TIME 39 SECONDS

DATE 17 10 14      TIME 13 32 43      OPERATOR ID ANC15 PPK  
RUN 221 ID MS 38      WEIGHT 1.909

SIGNALS

|                 |          |
|-----------------|----------|
| CARBON 59.16%   | ZR 4046  |
| HYDROGEN 6.15%  | NR 5782  |
| NITROGEN 19.72% | CR 20569 |
|                 | HR 22820 |

FILL TIME 39 SECONDS

DATE 17 10 14      TIME 13 34 20      OPERATOR ID ANC15 PPK  
RUN 222 ID MS 39      WEIGHT 1.944

SIGNALS

|                 |          |
|-----------------|----------|
| CARBON 56.76%   | ZR 4057  |
| HYDROGEN 4.47%  | NR 5922  |
| NITROGEN 18.58% | CR 20850 |
|                 | HR 28027 |

FILL TIME 39 SECONDS

DATE 17 10 14      TIME 13 36 10      OPERATOR ID ANC15 PPK  
RUN 223 ID MS 40              WEIGHT 1.904

SIGNALS

|                 |          |
|-----------------|----------|
| CARBON 58.27%   | ZR 4006  |
| HYDROGEN 5.88%  | NR 6134  |
| NITROGEN 20.39% | CR 20946 |
|                 | HR 24047 |

FILL TIME 39 SECONDS

DATE 17 10 14      TIME 13 38 10      OPERATOR ID ANC15 PPK  
RUN 224 ID MS 41              WEIGHT 1.882

SIGNALS

|                 |          |
|-----------------|----------|
| CARBON 53.17%   | ZR 4035  |
| HYDROGEN 4.49%  | NR 5829  |
| NITROGEN 16.35% | CR 21309 |
|                 | HR 27550 |

FILL TIME 39 SECONDS

DATE 17 10 14      TIME 13 40 39      OPERATOR ID ANC15 PPK  
RUN 225 ID MS 42              WEIGHT 1.850

SIGNALS

|                 |          |
|-----------------|----------|
| CARBON 55.53%   | ZR 4509  |
| HYDROGEN 5.96%  | NR 5905  |
| NITROGEN 17.99% | CR 21906 |
|                 | HR 29560 |

FILL TIME 39 SECONDS
